# Supplementary material for: One-pot hydrothermal synthesis of luminescent silicon-based nanoparticles for highly specific detection of oxytetracyclineviaratiometric fluorescent strategy
Source: Royal Society of Chemistry journal article supplement (doi:10.1039/c7ra09338a), 2017-01-01
Supplement: c7ra09338a1.pdf [file c7ra09338a1.pdf]

# **One-pot hydrothermal synthesis of luminescent silicon-based nanoparticles for highly specific detection of oxytetracycline *via* ratiometric fluorescent strategy**

Na Xu<sup>a</sup>, Yaqing Yuan<sup>a</sup>, Jian-hang Yin<sup>a</sup>, Xue Wang<sup>a</sup>, Lei Meng<sup>a,b\*</sup>

*<sup>a</sup>College of Materials Science and Engineering, Jilin Institute of Chemical Technology, Jilin 132022, China.*

*<sup>b</sup>College of Science, Jilin Institute of Chemical Technology, Jilin 132022, China.*

\*E-mail: [ml\\_0512@163.com](mailto:ml_0512@163.com) (Lei Meng)

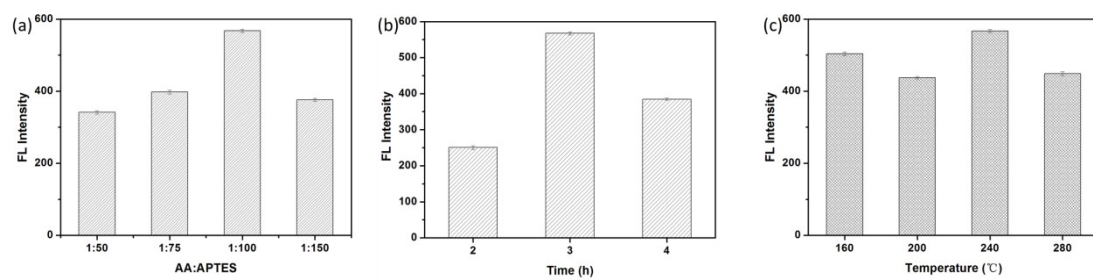

**Fig. S1.** Fluorescence intensity at 436 nm of 4 mM SiNPs being synthesized at various molar ratios of (a) AA to APTES, (b) reaction times, and (c) temperatures, respectively.

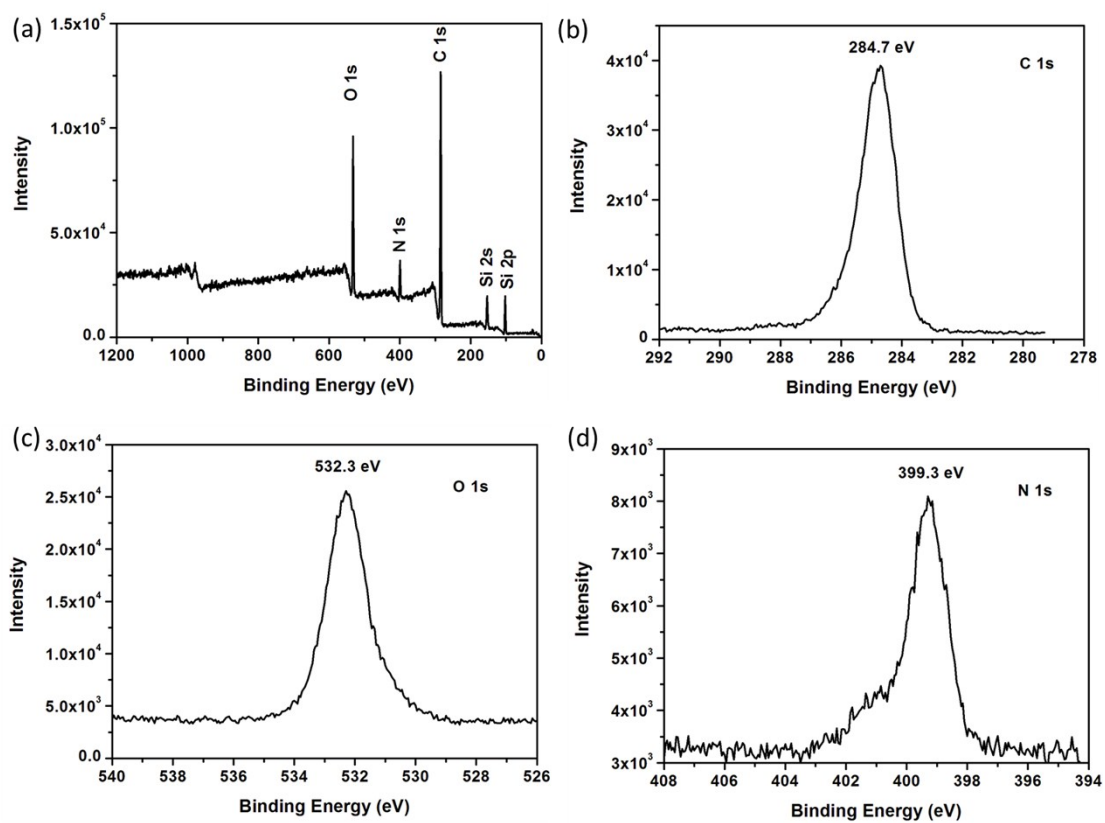

**Fig. S2.** (a) Wide scan XPS spectrum of the Si NPs, and enlarge regions of (b) C1s, (c) O1s and N1s XPS spectra.

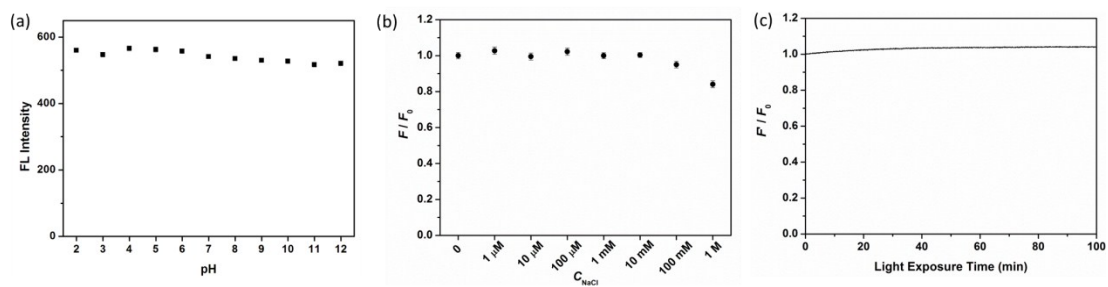

**Fig. S3.** (a) Fluorescence intensity of SiNPs in solutions under the conditions of various pH (BR buffer). (b) Relative fluorescence intensity ( $F/F_0$ ) of SiNPs in the presence of various concentrations of NaCl in solution.  $F_0$  and  $F$  are the fluorescence intensity in the absence and presence of NaCl solutions, respectively. (c) The time-dependent fluorescence changes of the SiNPs under 345 nm light illumination.  $F_0'$  and  $F'$  are the fluorescence intensity before and after the light exposure, respectively.

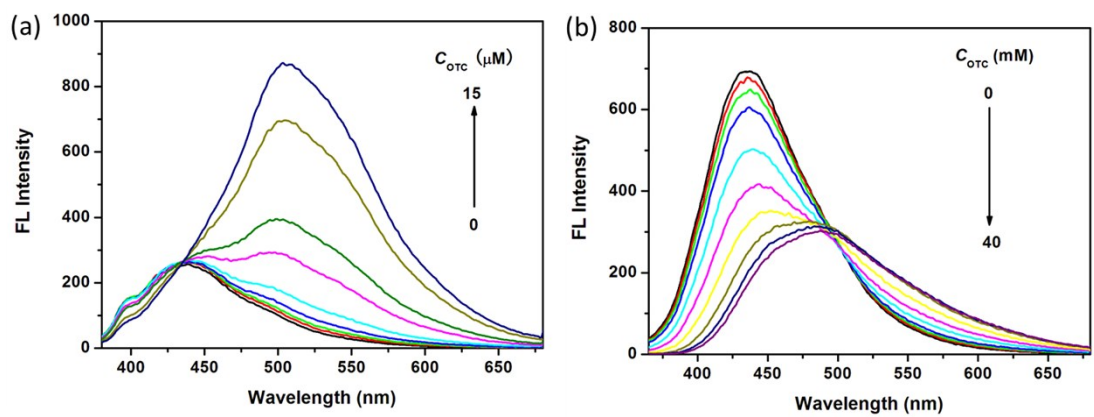

**Fig. S4.** FL response of (a) 2 mM and (b) 8 mM of SiNPs in the presence of various concentrations of OTC, respectively.

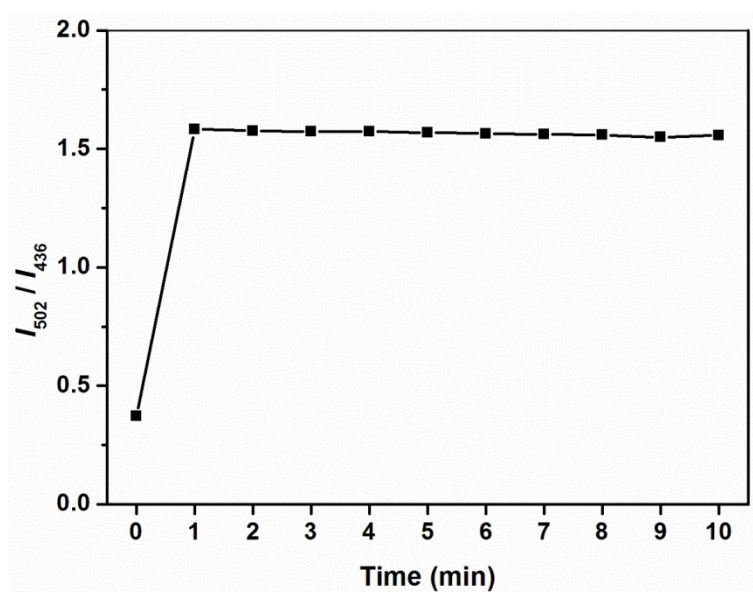

**Fig. S5.** The time-dependent fluorescence intensities change ( $I_{502}/I_{436}$ ) of SiNPs (4 mM) toward OTC (20  $\mu$ M).

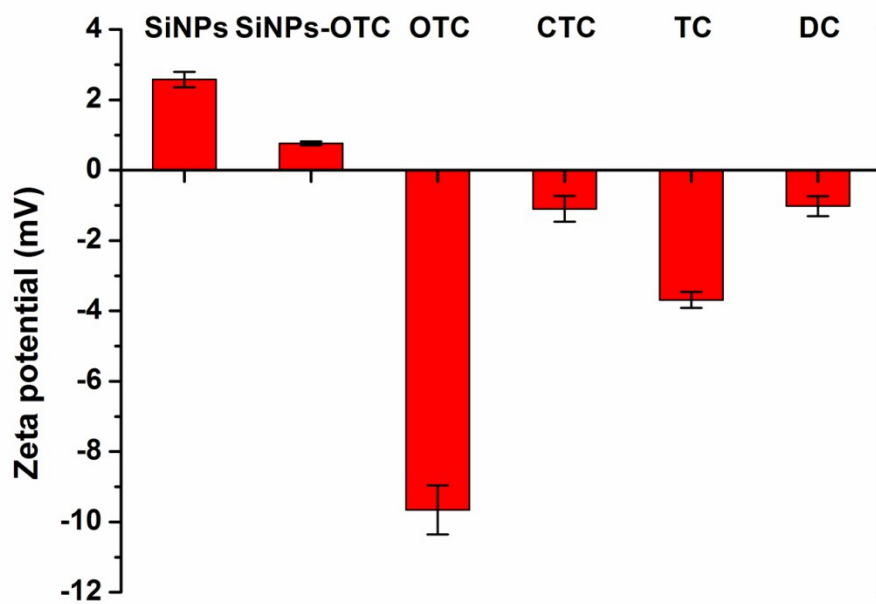

**Fig. S6.** Zeta potential of SiNPs, SiNPs-OTC, OTC, CTC, TC and DC in aqueous solution.

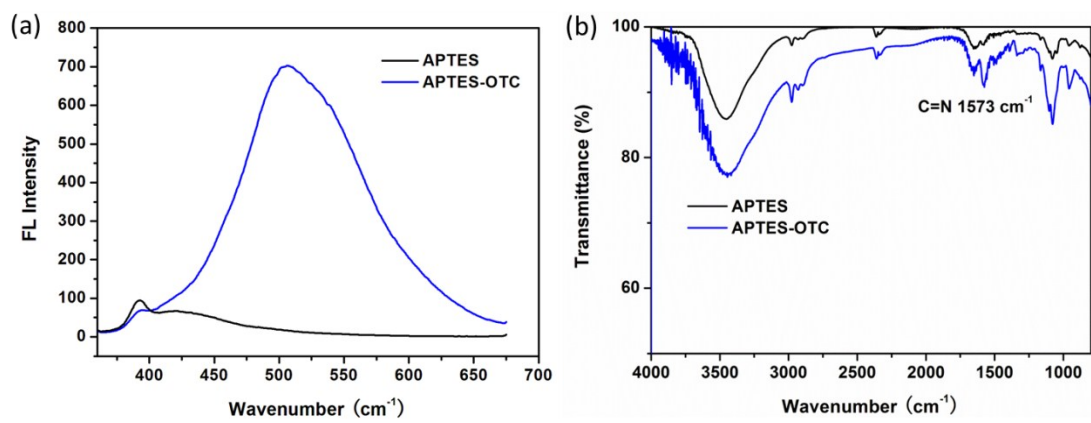

**Fig. S7.** (a) FL response and FT-IR spectra of APTES in absence and presence of OTC.



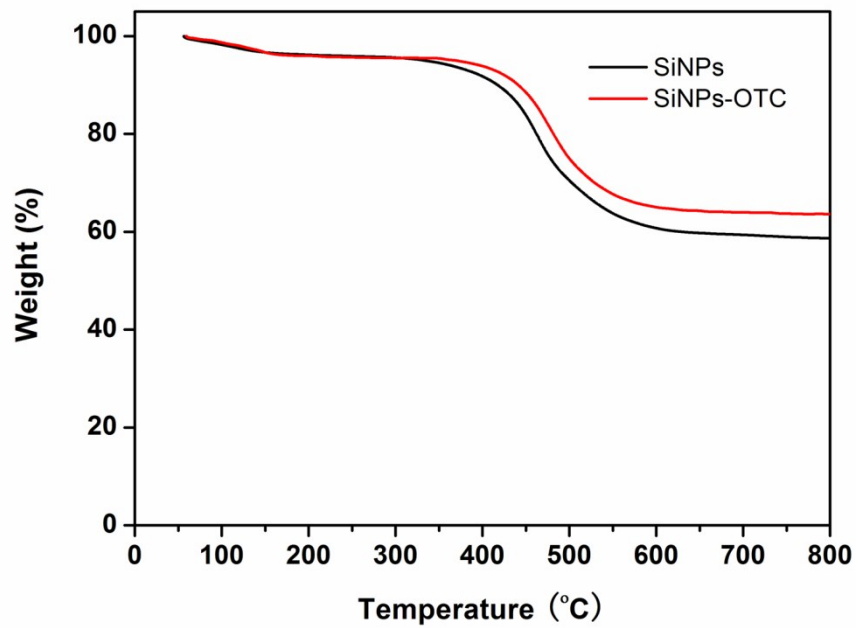

**Fig. S8.** Weight loss curves of SiNPs and SiNPs-OTC complex.

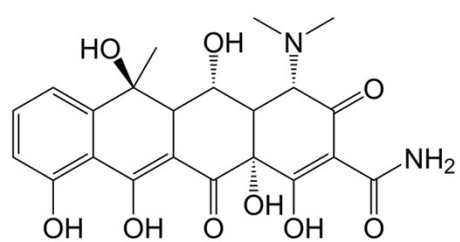

**Oxytetracycline**

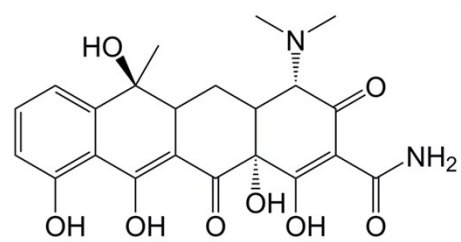

**Tetracycline**

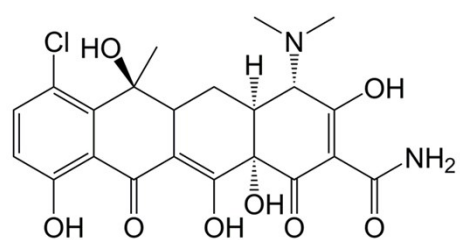

**Chlortetracycline**

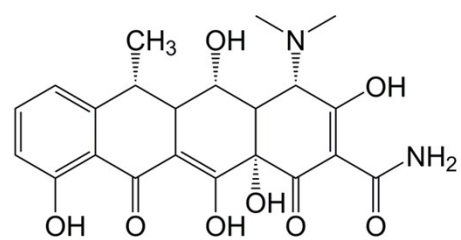

**Doxycycline**

**Scheme S1.** Schematic structures of OTC, TC, CTC and DC.

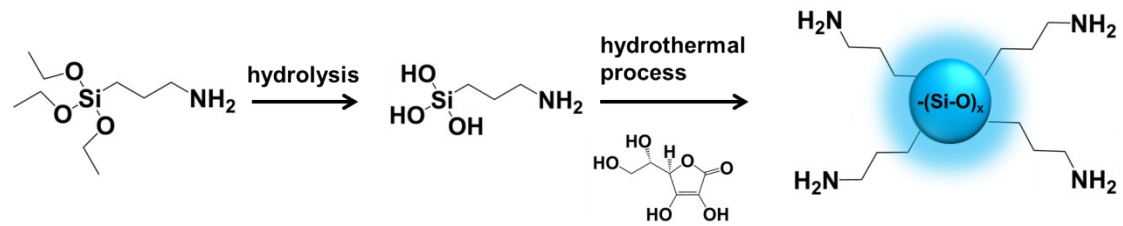

**Scheme S2.** Schematic illustration of formation processes of SiNPs.

**Table S1.** Research papers available up to now concerning different fluorescent sensors for detection of OTC.

| <b>Ref. No.</b> | <b>Materials</b>          | <b>LOD</b>    | <b>Interference</b>   | <b>Fluorescence response strategy</b> |
|-----------------|---------------------------|---------------|-----------------------|---------------------------------------|
| S1              | NaYF <sub>4</sub> :Yb NPs | 0.054 ng/ml   | -                     | ratiometric ( $I_{530}/I_{477}$ )     |
| S2              | Carbon dots               | 0.03 $\mu$ M  | TC, DC                | Turn-off ( $I_{435}$ )                |
| S3              | AuNPs                     | 0.15 $\mu$ M  | -                     | Turn-on ( $I_{510}$ )                 |
| S4              | BODIPY                    | 0.72 $\mu$ M  | Fe <sup>3+</sup> , TC | Turn-off ( $I_{515}$ )                |
| S5              | Long-chain ssDNA          | 0.01 $\mu$ M  | -                     | Turn-off ( $I_{520}$ )                |
| S6              | Carbon dots               | 0.02 $\mu$ M  | TC, CTC               | Turn-off ( $I_{507}$ )                |
| S7              | Europium-SiNPs            | 0.005 $\mu$ M | TC                    | ratiometric ( $I_{617}/I_{450}$ )     |
| This work       | SiNPs                     | 0.18 $\mu$ M  | -                     | ratiometric ( $I_{502}/I_{436}$ )     |

## References in ESI

- [S1] Zhang H, Fang C, Wu S, et al. Upconversion luminescence resonance energy transfer-based aptasensor for the sensitive detection of oxytetracycline[J]. *Analytical biochemistry*, 2015, 489: 44-49.
- [S2] Feng Y, Zhong D, Miao H, et al. Carbon dots derived from rose flowers for tetracycline sensing[J]. *Talanta*, 2015, 140: 128-133.
- [S3] Xu S, Li X, Mao Y, et al. Novel dual ligand co-functionalized fluorescent gold nanoclusters as a versatile probe for sensitive analysis of Hg<sup>2+</sup> and oxytetracycline[J]. *Analytical and bioanalytical chemistry*, 2016, 408(11): 2955-2962.
- [S4] Xu Z, Yi X, Wu Q, et al. First report on a BODIPY-based fluorescent probe for sensitive detection of oxytetracycline: application for the rapid determination of oxytetracycline in milk, honey and pork[J]. *RSC Advances*, 2016, 6(92): 89288-89297.
- [S5] Yuan F, Zhao H, Zhang Z, et al. Fluorescent biosensor for sensitive analysis of oxytetracycline based on an indirectly labelled long-chain aptamer[J]. *RSC Advances*, 2015, 5(72): 58895-58901.
- [S6] An X, Zhuo S, Zhang P, et al. Carbon dots based turn-on fluorescent probes for oxytetracycline hydrochloride sensing[J]. *RSC Advances*, 2015, 5(26): 19853-19858.
- [S7] Li X, Ma H, Deng M, et al. Europium functionalized ratiometric fluorescent transducer silicon nanoparticles based on FRET for the highly sensitive detection of tetracycline[J]. *Journal of Materials Chemistry C*, 2017, 5(8): 2149-2152.
